# Supplementary material for: Facile synthesis of Sb3+-doped (Bmim)2InCl5(H2O) through a grinding method for light-emitting diodes
Source: Royal Society of Chemistry journal article supplement (doi:10.1039/d3dt00673e), 2023-01-01
Supplement: d3dt00673e1.pdf [file d3dt00673e1.pdf]

Electronic Supplementary Information (ESI) for Dalton Transactions

**Facile synthesis of  $\text{Sb}^{3+}:(\text{Bmim})_2\text{InCl}_5(\text{H}_2\text{O})$  through a grinding method for light-emitting diodes**

Jiayue Hao<sup>abc</sup>, Ran An<sup>c</sup>, Yao Li<sup>c</sup>, Ke Wang<sup>c</sup>, Shuyan Song,<sup>bc</sup> Jing Feng<sup>\*abc</sup>, Xinyu Wang<sup>\*c</sup>,  
Hongjie Zhang<sup>\*bc</sup>

<sup>a</sup> School of Chemistry and Chemical Engineering, Nanchang University, Nanchang 330031, China

<sup>b</sup> Ganjiang Innovation Academy, Chinese Academy of Sciences, Ganzhou 341000, China

<sup>c</sup> State Key Laboratory of Rare Earth Resource Utilization, Changchun Institute of Applied Chemistry, Chinese Academy of Sciences, Changchun 130022, P. R. China.

\*Corresponding authors.

E-mail addresses: fengj@ciac.ac.cn (J. Feng), hongjie@ciac.ac.cn (H. J. Zhang)

## Supporting Tables

**Table S1. The single crystal X-ray diffraction data of (Bmim)<sub>2</sub>InCl<sub>5</sub>(H<sub>2</sub>O)**

| Empirical formula                       | C <sub>16</sub> H <sub>32</sub> Cl <sub>5</sub> InN <sub>4</sub> O |
|-----------------------------------------|--------------------------------------------------------------------|
| Formula weight                          | 588.52                                                             |
| Temperature/K                           | 173                                                                |
| Crystal system                          | monoclinic                                                         |
| Space group                             | P2 <sub>1</sub> /n                                                 |
| a/Å                                     | 8.7805(3)                                                          |
| b/Å                                     | 13.8362(5)                                                         |
| c/Å                                     | 21.0836(8)                                                         |
| $\alpha$ /°                             | 90                                                                 |
| $\beta$ /°                              | 96.1830(10)                                                        |
| $\gamma$ /°                             | 90                                                                 |
| Volume/Å <sup>3</sup>                   | 2546.52(16)                                                        |
| Z                                       | 4                                                                  |
| $\rho_{\text{calc}}$ / cm <sup>3</sup>  | 1.535                                                              |
| $\mu$ / mm <sup>-1</sup>                | 1.466                                                              |
| Radiation                               | Mo K $\alpha$ ( $\lambda$ = 0.71073)                               |
| Reflections collected                   | 74745                                                              |
| Goodness of fit on F <sup>2</sup>       | 1.078                                                              |
| Final R indexes [ $I \geq 2\sigma(I)$ ] | R <sub>1</sub> = 0.0304, wR <sub>2</sub> = 0.0640                  |
| Final R indexes [all data]              | R <sub>1</sub> = 0.0387, wR <sub>2</sub> = 0.0679                  |

**Table S2. Bond lengths of (Bmim)<sub>2</sub>InCl<sub>5</sub>(H<sub>2</sub>O)**

| bond    | lengths (Å) | bond     | lengths (Å) |
|---------|-------------|----------|-------------|
| In1-Cl1 | 2.4753(6)   | N3-C11   | 1.382(3)    |
| In1-Cl2 | 2.5441(5)   | N3-C13   | 1.472(3)    |
| In1-Cl4 | 2.5368(5)   | N4-C9    | 1.462(3)    |
| In1-Cl5 | 2.4825(5)   | N4-C10   | 1.326(3)    |
| In1-Cl6 | 2.4518(6)   | N4-C12   | 1.382(3)    |
| In1-O1  | 2.2984(15)  | C9-H9A   | 0.9800      |
| O1-H1D  | 0.8695      | C9-H9B   | 0.9800      |
| O1-H1E  | 0.8701      | C9-H9C   | 0.9800      |
| N1-C3   | 1.374(3)    | C10-H10  | 0.9500      |
| N1-C4   | 1.329(3)    | C11-H11  | 0.9500      |
| N1-C5   | 1.473(3)    | C11-C12  | 1.346(4)    |
| N2-C1   | 1.466(3)    | C12-H12  | 0.9500      |
| N2-C2   | 1.370(3)    | C13-H13A | 0.9900      |
| N2-C4   | 1.322(3)    | C13-H13B | 0.9900      |
| C1-H1A  | 0.9800      | C13-C14  | 1.516(5)    |
| C1-H1B  | 0.9800      | C14-H14C | 0.9900      |
| C1-H1C  | 0.9800      | C14-H14D | 0.9900      |
| C2-H2   | 0.9500      | C14-H14A | 0.9900      |
| C2-C3   | 1.345(4)    | C14-H14B | 0.9900      |
| C3-H3   | 0.9500      | C14-C17  | 1.360(9)    |
| C4-H4   | 0.9500      | C14-C15  | 1.296(7)    |
| C5-H5A  | 0.9900      | C17-H17A | 0.9900      |
| C5-H5B  | 0.9900      | C17-H17B | 0.9900      |
| C5-C6   | 1.514(4)    | C17-C18  | 1.850(15)   |
| C6-H6A  | 0.9900      | C18-H18A | 0.9800      |
| C6-H6B  | 0.9900      | C18-H18B | 0.9800      |
| C6-C7   | 1.528(4)    | C18-H18C | 0.9800      |

|        |          |          |           |
|--------|----------|----------|-----------|
| C7-H7A | 0.9900   | C15-H15A | 0.9900    |
| C7-H7B | 0.9900   | C15-H15B | 0.9900    |
| C7-C8  | 1.507(5) | C15-C16  | 1.956(13) |
| C8-H8A | 0.9800   | C16-H16A | 0.9800    |
| C8-H8B | 0.9800   | C16-H16B | 0.9800    |
| C8-H8C | 0.9800   | C16-H16C | 0.9800    |
| N3-C10 | 1.331(3) |          |           |

---

**Table S3. Bond angles of (Bmim)<sub>2</sub>InCl<sub>5</sub>(H<sub>2</sub>O)**

| Atom        | Angle / °   | Atom          | Angle / ° |
|-------------|-------------|---------------|-----------|
| C11-In1-Cl2 | 87.325(19)  | C10-N3-C11    | 108.5(2)  |
| C11-In1-Cl4 | 171.70(2)   | C10-N3-C13    | 126.2(2)  |
| C11-In1-Cl5 | 92.21(2)    | C11-N3-C13    | 125.3(2)  |
| C14-In1-Cl2 | 89.860(17)  | C10-N4-C9     | 125.9(2)  |
| C15-In1-Cl2 | 165.768(19) | C10-N4-C12    | 108.6(2)  |
| C15-In1-Cl4 | 88.606(18)  | C12-N4-C9     | 125.5(2)  |
| C16-In1-Cl1 | 94.47(2)    | N4-C9-H9A     | 109.50    |
| C16-In1-Cl2 | 96.03(2)    | N4-C9-H9B     | 109.50    |
| C16-In1-Cl4 | 93.59(2)    | N4-C9-H9C     | 109.50    |
| C16-In1-Cl5 | 98.19(2)    | H9A-C9-H9B    | 109.50    |
| O1-In1-Cl1  | 86.33(4)    | H9A-C9-H9C    | 109.50    |
| O1-In1-Cl2  | 82.02(4)    | H9B-C9-H9C    | 109.50    |
| O1-In1-Cl4  | 85.54(4)    | N3-C10-H10    | 125.60    |
| O1-In1-Cl5  | 83.76(4)    | N4-C10-N3     | 108.8(2)  |
| O1-In1-Cl6  | 177.86(4)   | N4-C10-H10    | 125.60    |
| In1-O1-H1D  | 109.30      | N3-C11-H11    | 126.50    |
| In1-O1-H1E  | 109.40      | C12-C11-N3    | 107.1(2)  |
| H1D-O1-H1E  | 104.50      | C12-C11-H11   | 126.50    |
| C3-N1-C5    | 125.8(2)    | N4-C12-H12    | 126.40    |
| C4-N1-C3    | 108.40(19)  | C11-C12-N4    | 107.2(2)  |
| C4-N1-C5    | 125.76(19)  | C11-C12-H12   | 126.40    |
| C2-N2-C1    | 125.1(2)    | N3-C13-H13A   | 109.40    |
| C4-N2-C1    | 126.6(2)    | N3-C13-H13B   | 109.40    |
| C4-N2-C2    | 108.3(2)    | N3-C13-C14    | 111.0(3)  |
| N2-C1-H1A   | 109.50      | H13A-C13-H13B | 108.00    |
| N2-C1-H1B   | 109.50      | C14-C13-H13A  | 109.40    |
| N2-C1-H1C   | 109.50      | C14-C13-H13B  | 109.40    |

|            |            |               |          |
|------------|------------|---------------|----------|
| H1A-C1-H1B | 109.50     | C13-C14-H14C  | 103.60   |
| H1A-C1-H1C | 109.50     | C13-C14-H14D  | 103.60   |
| H1B-C1-H1C | 109.50     | C13-C14-H14A  | 107.90   |
| N2-C2-H2   | 126.20     | C13-C14-H14B  | 107.90   |
| C3-C2-N2   | 107.6(2)   | H14C-C14-H14D | 105.30   |
| C3-C2-H2   | 126.20     | H14A-C14-H14B | 107.20   |
| N1-C3-H3   | 126.60     | C17-C14-C13   | 134.3(6) |
| C2-C3-N1   | 106.8(2)   | C17-C14-H14C  | 103.60   |
| C2-C3-H3   | 126.60     | C17-C14-H14D  | 103.60   |
| N1-C4-H4   | 125.60     | C15-C14-C13   | 117.8(4) |
| N2-C4-N1   | 108.88(19) | C15-C14-H14A  | 107.90   |
| N2-C4-H4   | 125.60     | C15-C14-H14B  | 107.90   |
| N1-C5-H5A  | 109.10     | C14-C17-H17A  | 113.10   |
| N1-C5-H5B  | 109.10     | C14-C17-H17B  | 113.10   |
| N1-C5-C6   | 112.4(2)   | C14-C17-C18   | 92.9(6)  |
| H5A-C5-H5B | 107.90     | H17A-C17-H17B | 110.50   |
| C6-C5-H5A  | 109.10     | C18-C17-H17A  | 113.10   |
| C6-C5-H5B  | 109.10     | C18-C17-H17B  | 113.10   |
| C5-C6-H6A  | 109.00     | C17-C18-H18A  | 109.50   |
| C5-C6-H6B  | 109.00     | C17-C18-H18B  | 109.50   |
| C5-C6-C7   | 113.1(2)   | C17-C18-H18C  | 109.50   |
| H6A-C6-H6B | 107.80     | H18A-C18-H18B | 109.50   |
| C7-C6-H6A  | 109.00     | H18A-C18-H18C | 109.50   |
| C7-C6-H6B  | 109.00     | H18B-C18-H18C | 109.50   |
| C6-C7-H7A  | 109.10     | C14-C15-H15A  | 112.10   |
| C6-C7-H7B  | 109.10     | C14-C15-H15B  | 112.10   |
| H7A-C7-H7B | 107.80     | C14-C15-C16   | 98.4(5)  |
| C8-C7-C6   | 112.7(3)   | H15A-C15-H15B | 109.70   |
| C8-C7-H7A  | 109.10     | C16-C15-H15A  | 112.10   |

|            |        |               |        |
|------------|--------|---------------|--------|
| C8-C7-H7B  | 109.10 | C16-C15-H15B  | 112.10 |
| C7-C8-H8A  | 109.50 | C15-C16-H16A  | 109.50 |
| C7-C8-H8B  | 109.50 | C15-C16-H16B  | 109.50 |
| C7-C8-H8C  | 109.50 | C15-C16-H16C  | 109.50 |
| H8A-C8-H8B | 109.50 | H16A-C16-H16B | 109.50 |
| H8A-C8-H8C | 109.50 | H16A-C16-H16C | 109.50 |
| H8B-C8-H8C | 109.50 |               |        |

---

**Table S4. ICP-OES data of Sb:(Bmim)<sub>2</sub>InCl<sub>5</sub>(H<sub>2</sub>O)**

| Feeding ratio (%) |    | Actual ratio (%) |      |
|-------------------|----|------------------|------|
| In                | Sb | In               | Sb   |
| 80                | 20 | 94.26            | 5.74 |
| 85                | 15 | 97.38            | 2.62 |
| 90                | 10 | 99.14            | 0.86 |
| 95                | 5  | 99.28            | 0.72 |
| 99                | 1  | 99.82            | 0.18 |



## Supporting Figure

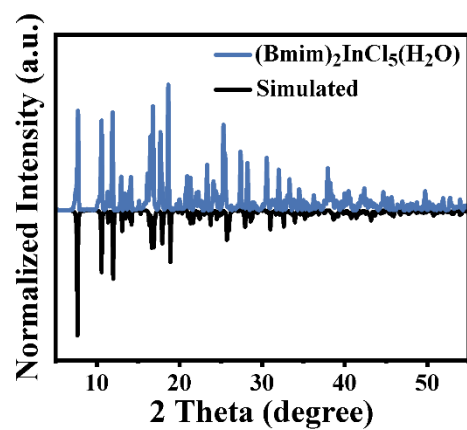

**Fig. S1** The simulated and the experimentally obtained PXRD patterns of  $(\text{Bmim})_2\text{InCl}_5(\text{H}_2\text{O})$ .

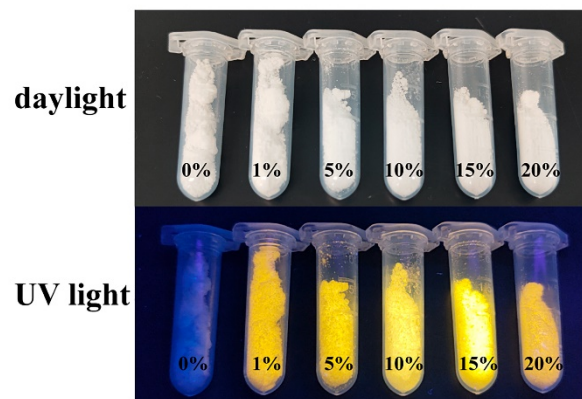

**Fig. S2** Photographs of  $x\% \text{Sb}^{3+}:(\text{Bmim})_2\text{InCl}_5(\text{H}_2\text{O})$  ( $x = 0, 1, 5, 10, 15, 20$ ) powder under daylight (top) and UV light (bottom).
